# Supplementary material for: Phospho‐regulation, nucleotide binding and ion access control in potassium‐chloride cotransporters
Source: PubMed Central journal article supplement (PMC8280820; doi:10.15252/embj.2020107294), 2021-05-25
Supplement: EMBJ-40-e107294-s002.pdf [file EMBJ-40-e107294-s002.pdf]

## Expanded View Figures

**Figure EV1. TMD and CTD arrangement in KCC1 $\Delta$ 19 and KCC3b-PM, in comparison to DrNKCC1 and CTD-free KCC1 (Related to Fig 1).**

- A Cartoon representation of the KCC3b-PM dimer with inset illustrating the TMD of one subunit. The transporter core domain is shown in orange, the scaffold domain in wheat.
- B, C Slab view of the transporter domain of KCC3 (construct: PM) (B) and KCC1 (construct:  $\Delta$ 19) (C) in surface representation, highlighting the inward-open conformations with intracellular accessible vestibules.
- D, E Extracellular view of the TMD dimer of KCC3b-PM (D) and DrNKCC1 (E).
- F, G Extracellular view onto central TM11/TM12 helices and CTD, highlighting counter-clockwise twisted CTD for KCC3b-PM (F) and clockwise twisted CTD for DrNKCC1 (G).
- H Extracellular view onto TMD dimer illustrating the alternative dimer interface observed in CTD-free KCC1 (6KKR).
- I Front view on CTD-free KCC1 dimer detailing molecular interactions (inset) between IL8 (blue helix) and TM12 characteristic for the configuration in 6KKR.

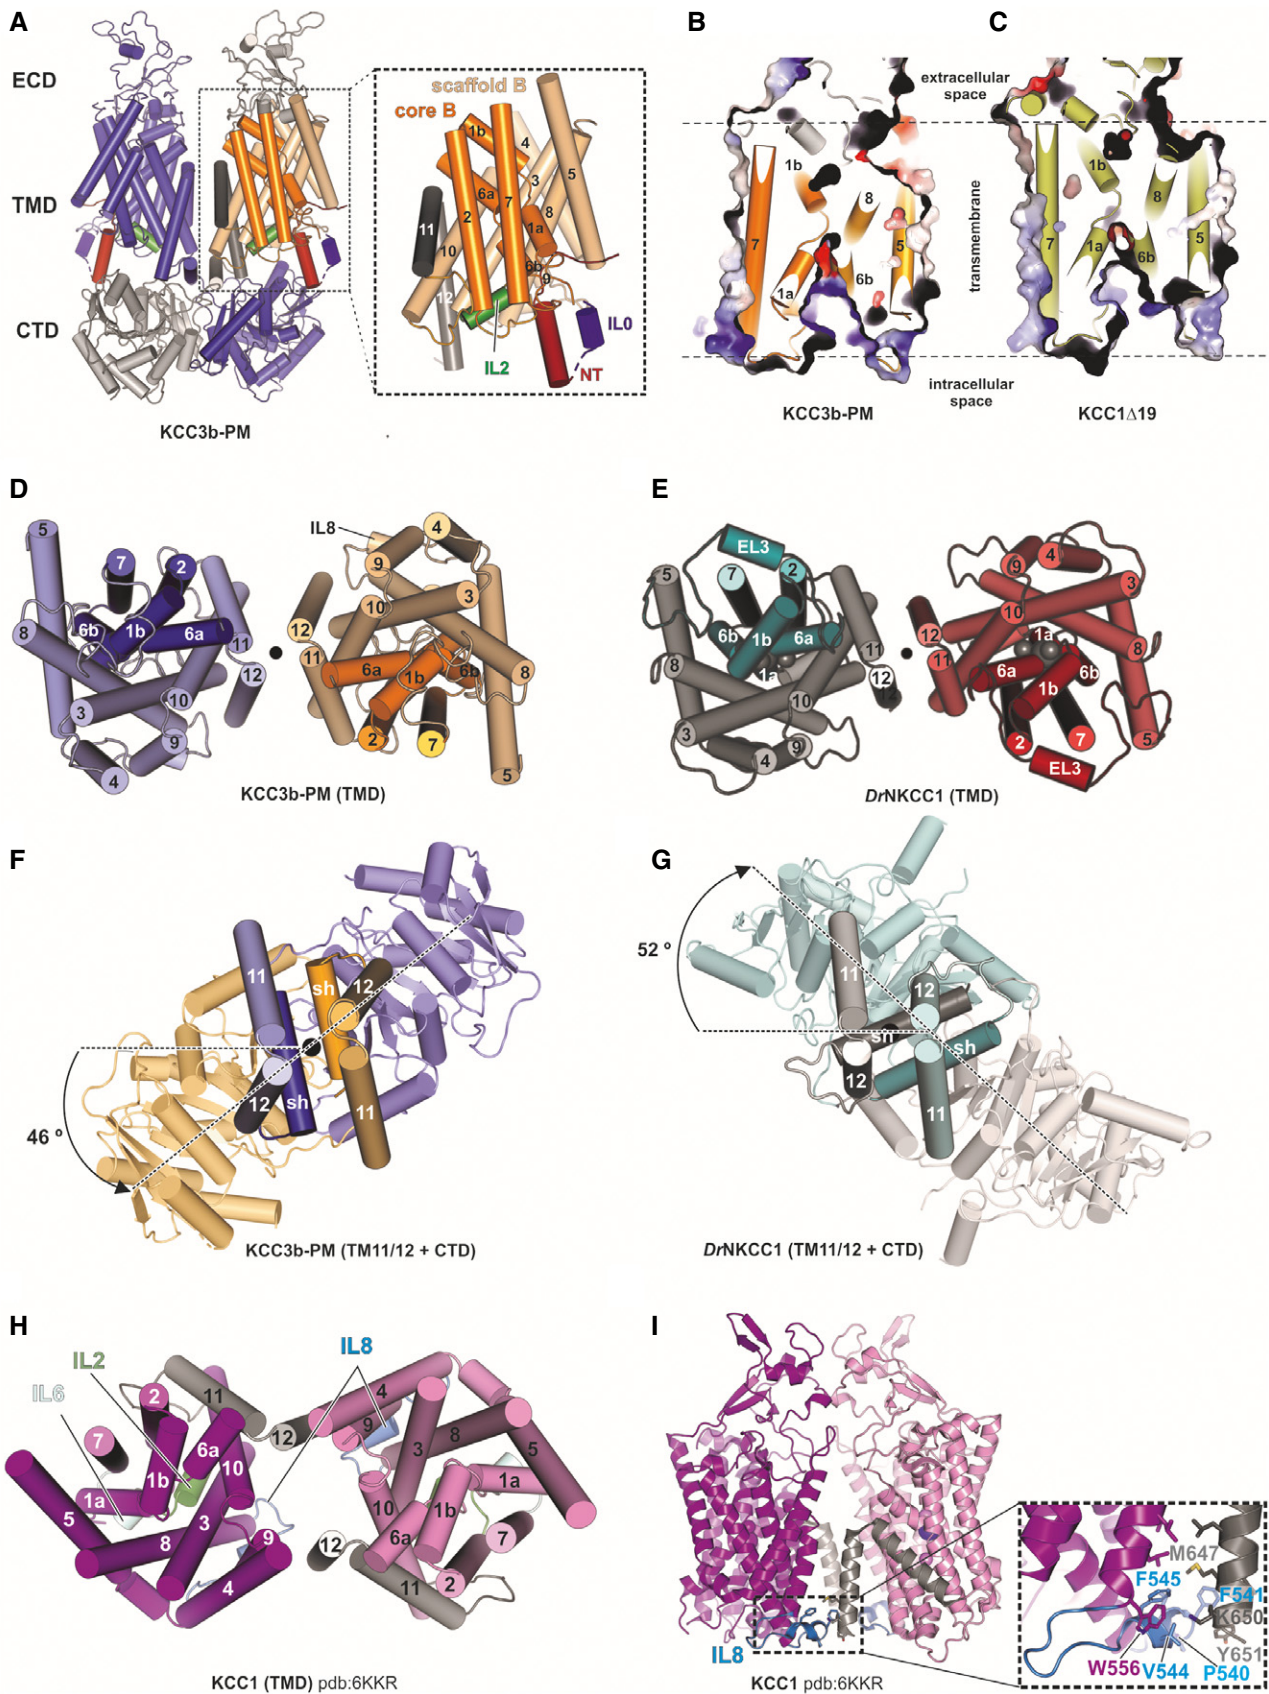

Figure EV1.

**Figure EV2. Detailed comparison of CTD-TMD interface of KCC3b and KCC1 structures (Related to Fig 2).**

- A–D Cryo-EM maps of KCC3b constructs determined in various conditions. Density for N-terminal helix (purple cartoon) is visible in the cryo-EM maps of KCC3b-PM in detergent environments, in both potassium-free (A) and potassium-saturated (D) conditions. On the other hand, there is no density for the N-terminal helix in the cryo-EM maps of KCC3b-WT in both detergent (B) and nanodisc (C) environments.
- E, F Comparison of KCC3b-PM and KCC1Δ19 at the cation-binding site. Density for inorganic ion is not present in the KCC3b-PM map (E), but it is present in KCC1Δ19 (F), suggesting its inverse correlation with the presence of N-terminal segment.
- G–J Differences in TMD/CTD interfaces between human KCC3b-PM (G, H) and *Dr*NKCC1 (I, J) as consequence of counter-clockwise and clockwise interdomain twist which brings either N-terminus (KCC3b) or C-terminus (*Dr*NKCC1) in close proximity to IL2. H: black frames highlight residues mutated to Ala for functional characterization in Appendix Fig S8.

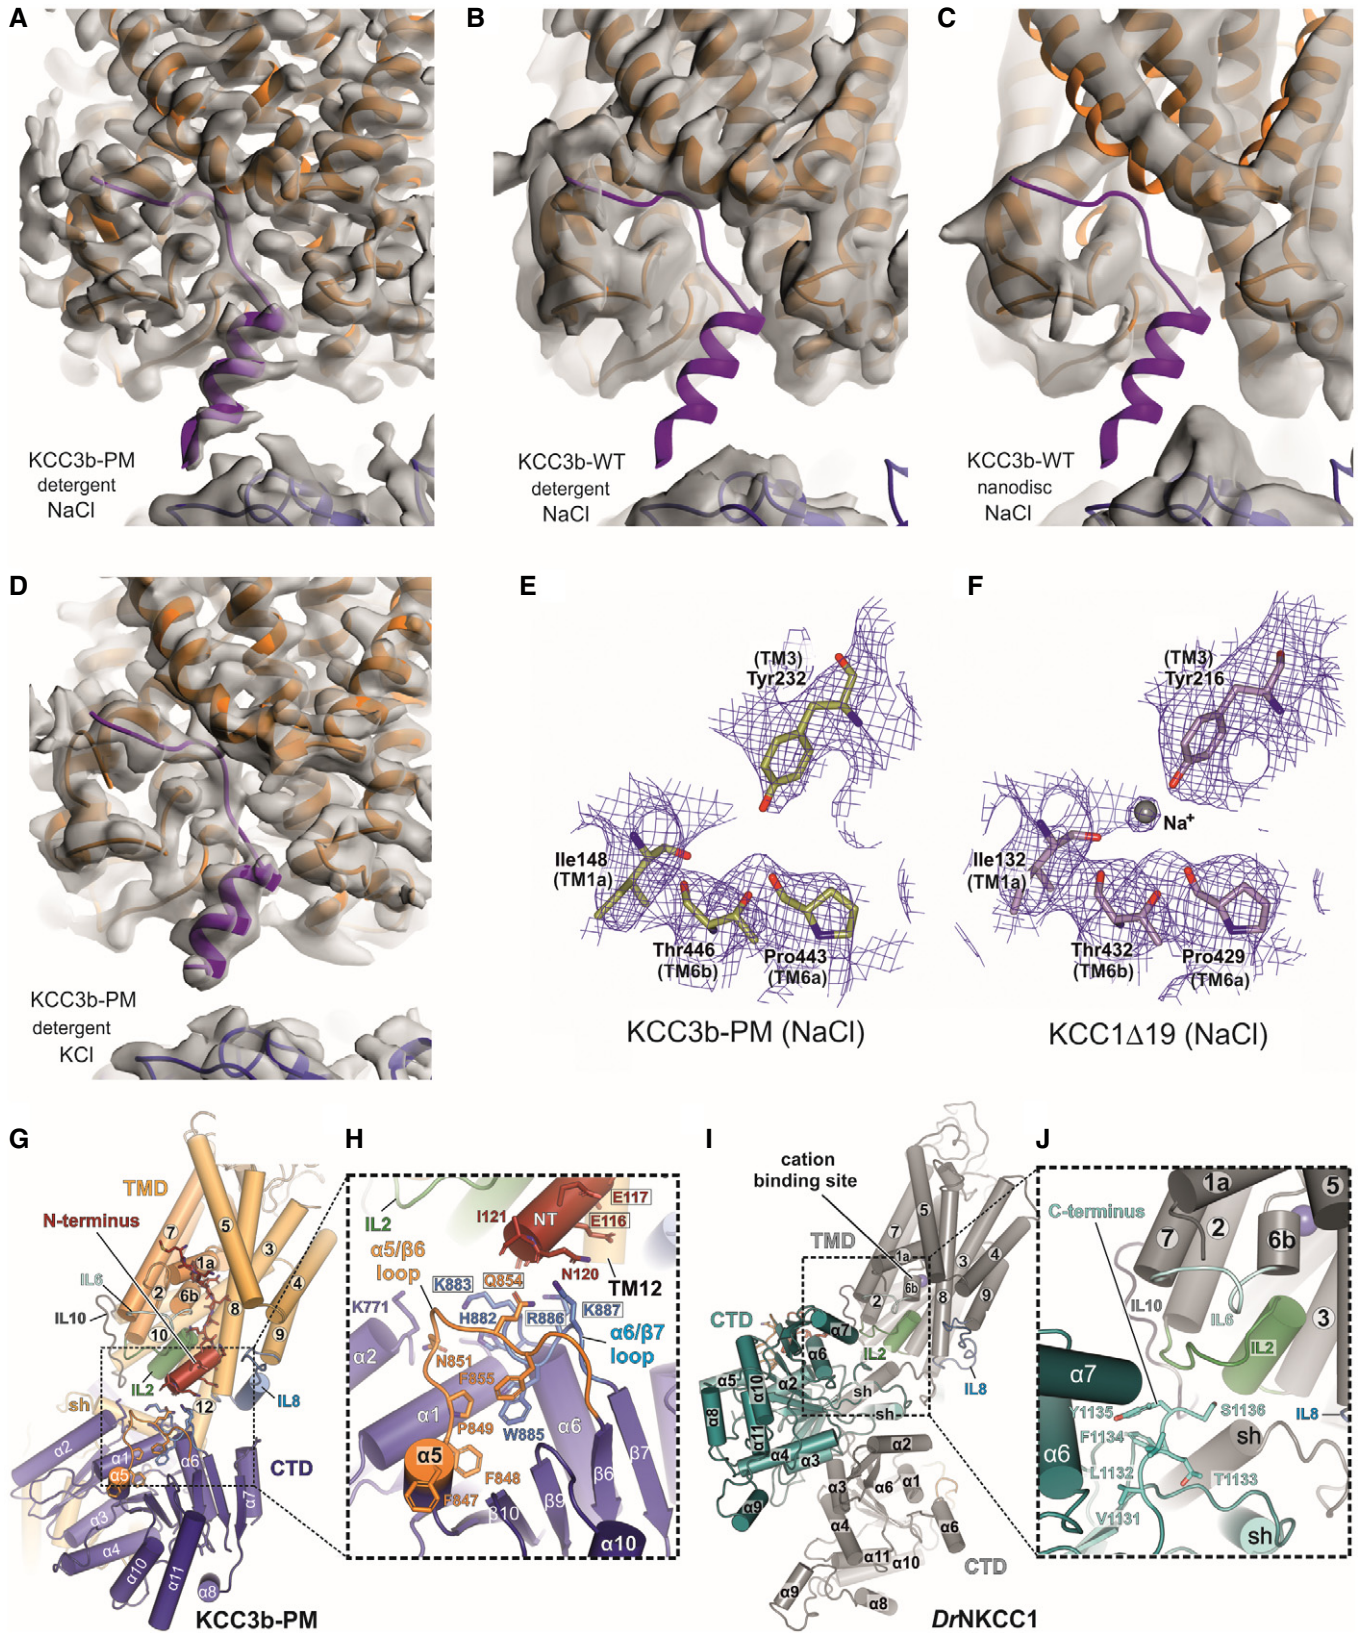

Figure EV2.

**Figure EV3. Rigid body groups and modes of movement in KCC1 and KCC3 (Related to Fig 3).**

- A Rigid body groups (oval circles) identified by 3D variability analyses of KCC1 and KCC3.
- B–E The two main modes of movement are represented by red (mode 0) and blue (mode 1) arrows. The extent of each movement is indicated by a numerical value (in either ° or Å) in blue/yellow for KCC1Δ19 and purple/orange for KCC3b-PM. (B–C): redisplay of Fig 3B and C. (B): front view, (C): side view, (D): cytoplasmic view, (E): extracellular view.
- F Alternative  $\alpha 8$  conformation in the CTD of KCC1 from 3D variability analysis (Fig 3D), highlighting residues involved in interactions stabilizing this conformation (state 2).
- G  $\alpha 8$  arrangement in *Dr*NKCC1 structure, showing similarities to the helical positioning in KCC1, state 2 (panel F).

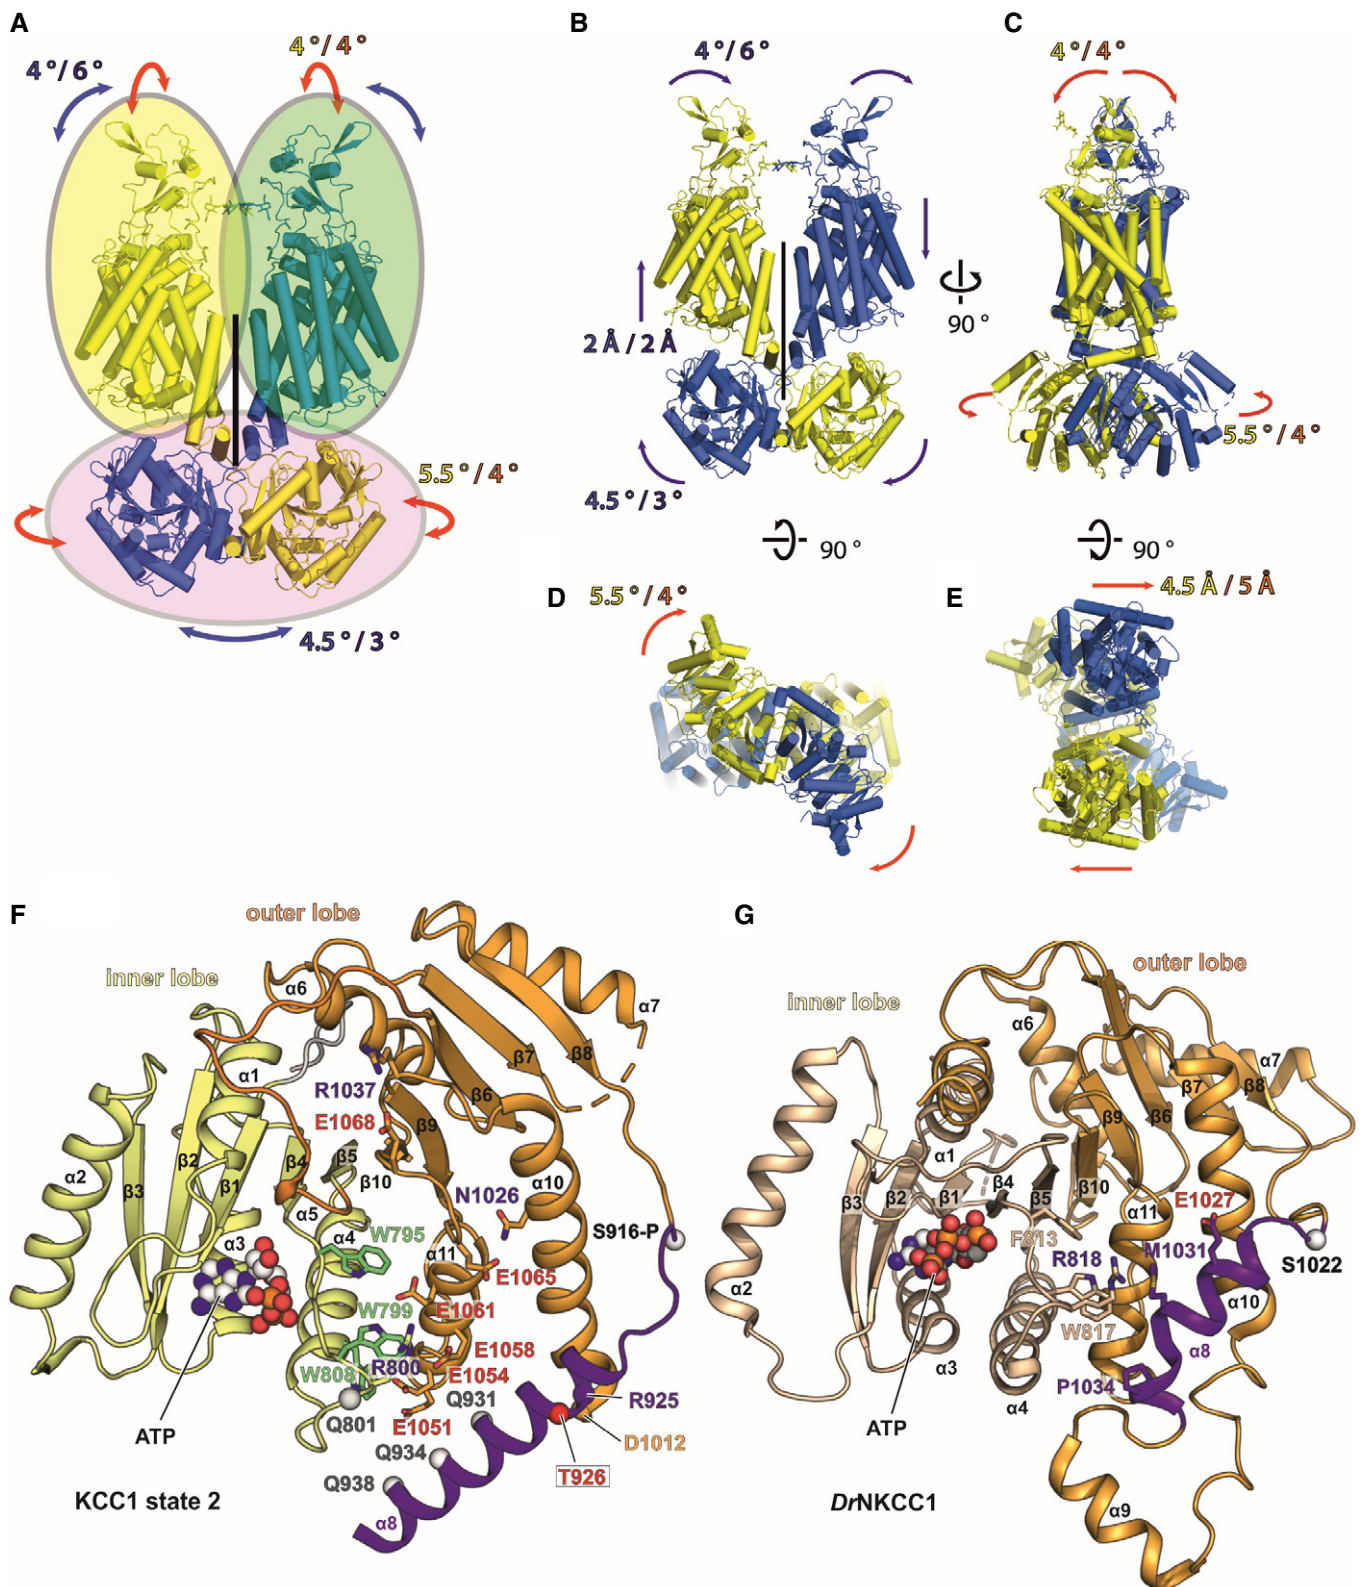

Figure EV3.

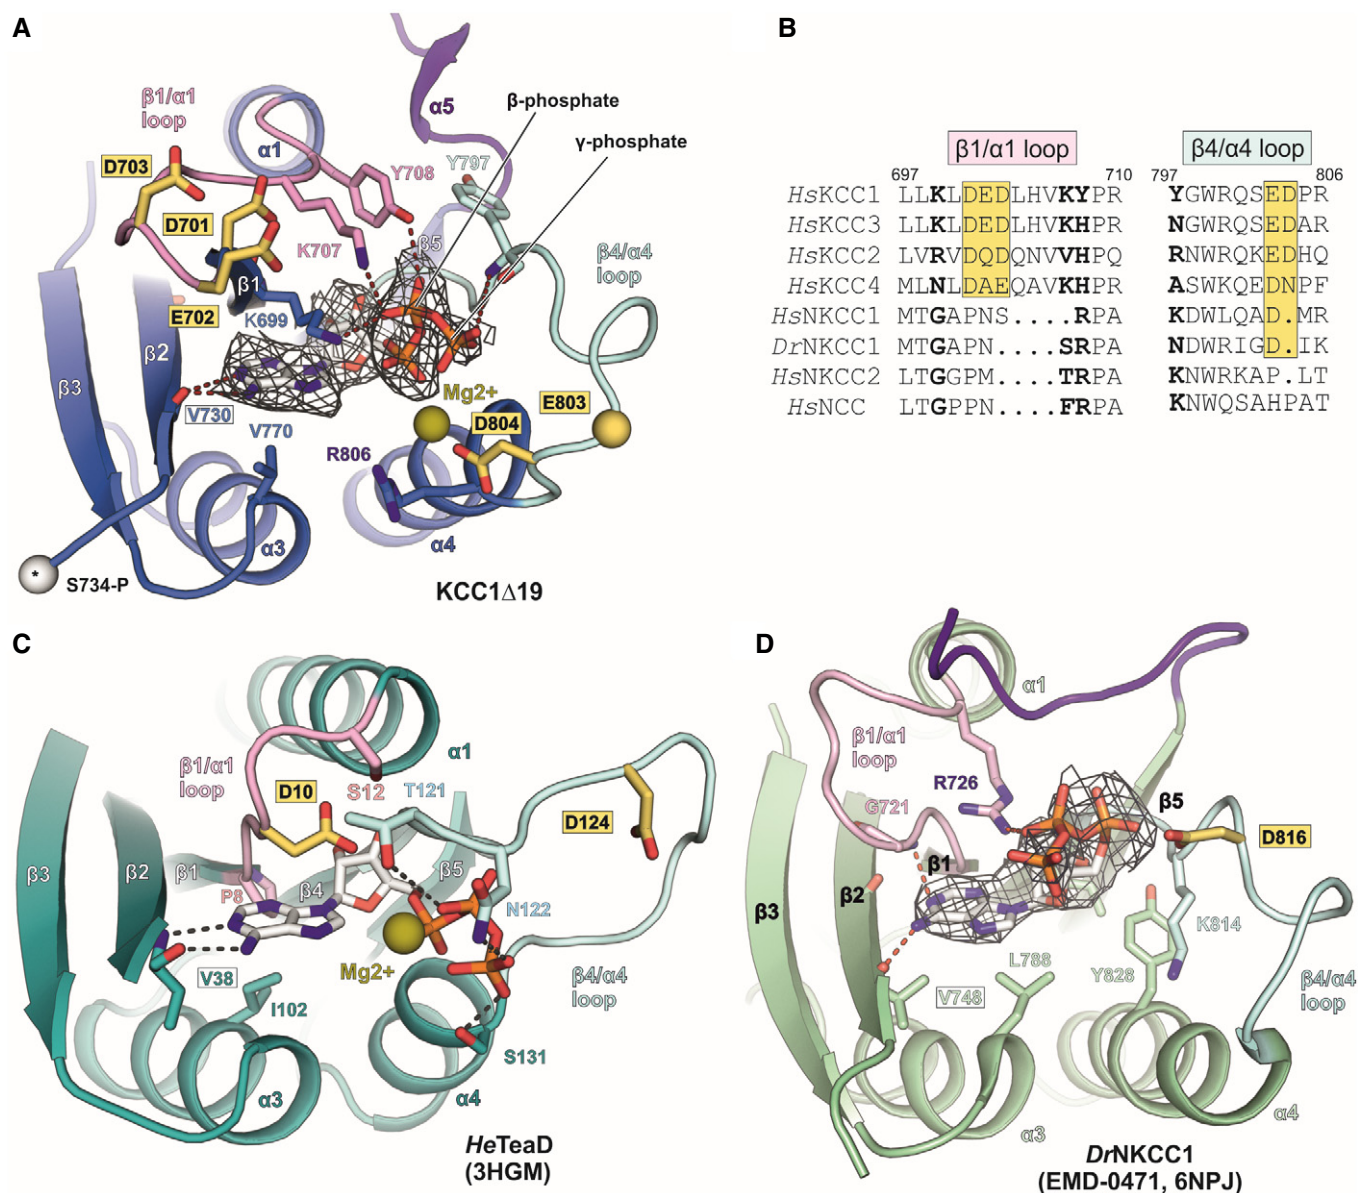

**Figure EV4. Comparison of ATP-binding modes in human KCC1Δ19, DrNKCC1 and the ectoine transporter regulatory subunit TeaD from *H. elongata* (Related to Fig 5).**

- A ATP (stick representation) fitted into EM density map (grey mesh) of human KCC1Δ19. White sphere with asterisk represents the  $\alpha$  atom of phosphorylation site S734-P in KCC1.
- B Sequence alignment of  $\beta$ 1/ $\alpha$ 1 and  $\beta$ 4/ $\alpha$ 4 loops for different members of the SLC12 family. Bold letters indicate residues involved in ATP binding. Yellow boxes highlight conserved, acidic residues.
- C ATP binding to the regulatory subunit TeaD (pdb: 3HGM) of the ectoine transporter TeaABC from *Halomonas elongata*.
- D ATP fitted into unmodelled densities (grey mesh) in the cryo-EM map of DrNKCC1. Labels for conserved valine residues engaged in the main polar backbone interaction with the nucleotide base are framed in a black box. Residues labelled in yellow-highlighted boxes in panels (A–D) are conserved acidic residues in the  $\beta$ 1/ $\alpha$ 1 and  $\beta$ 4/ $\alpha$ 4 loops of the CTD, which could potentially play a role in catalysing ATP hydrolysis, or in  $Mg^{2+}$  coordination.  $Mg^{2+}$  ions with a potential role for coordinating oxygen atoms in the  $\beta$ - and  $\gamma$ -phosphates of ATP are shown as olive spheres (positions are taken from 3HGM coordinates).

**Figure EV5. MD simulation for ATP bound to KCC1 and KCC3 (Related to Fig 6).**

- A Protein RMSD (teal trace) and ligand RMSD (purple trace) over the course of a 300 ns simulation of ATP bound to the KCC1 dimer (construct  $\Delta 19$ , complete model with 175,573 atoms).
- B, C Protein and ligand RMSD over the course of a 500 ns simulation of ATP bound to the isolated CTD of KCC1 (construct  $\Delta 19$ ) and KCC3b (construct PM) with 42,461 and 39,805 atoms, respectively.
- D, E Ligand-protein contacts for ATP, inferred from a 500 ns MD run of the isolated CTD KCC1 (construct  $\Delta 19$ ) (D) and KCC3b (construct PM) (E), respectively. Charged interactions are shown in red (negative) or blue (positive), hydrophobic interactions are shown in green. Further details regarding the nature of protein-ligand interactions are provided in the legend shown in Appendix Fig S12.



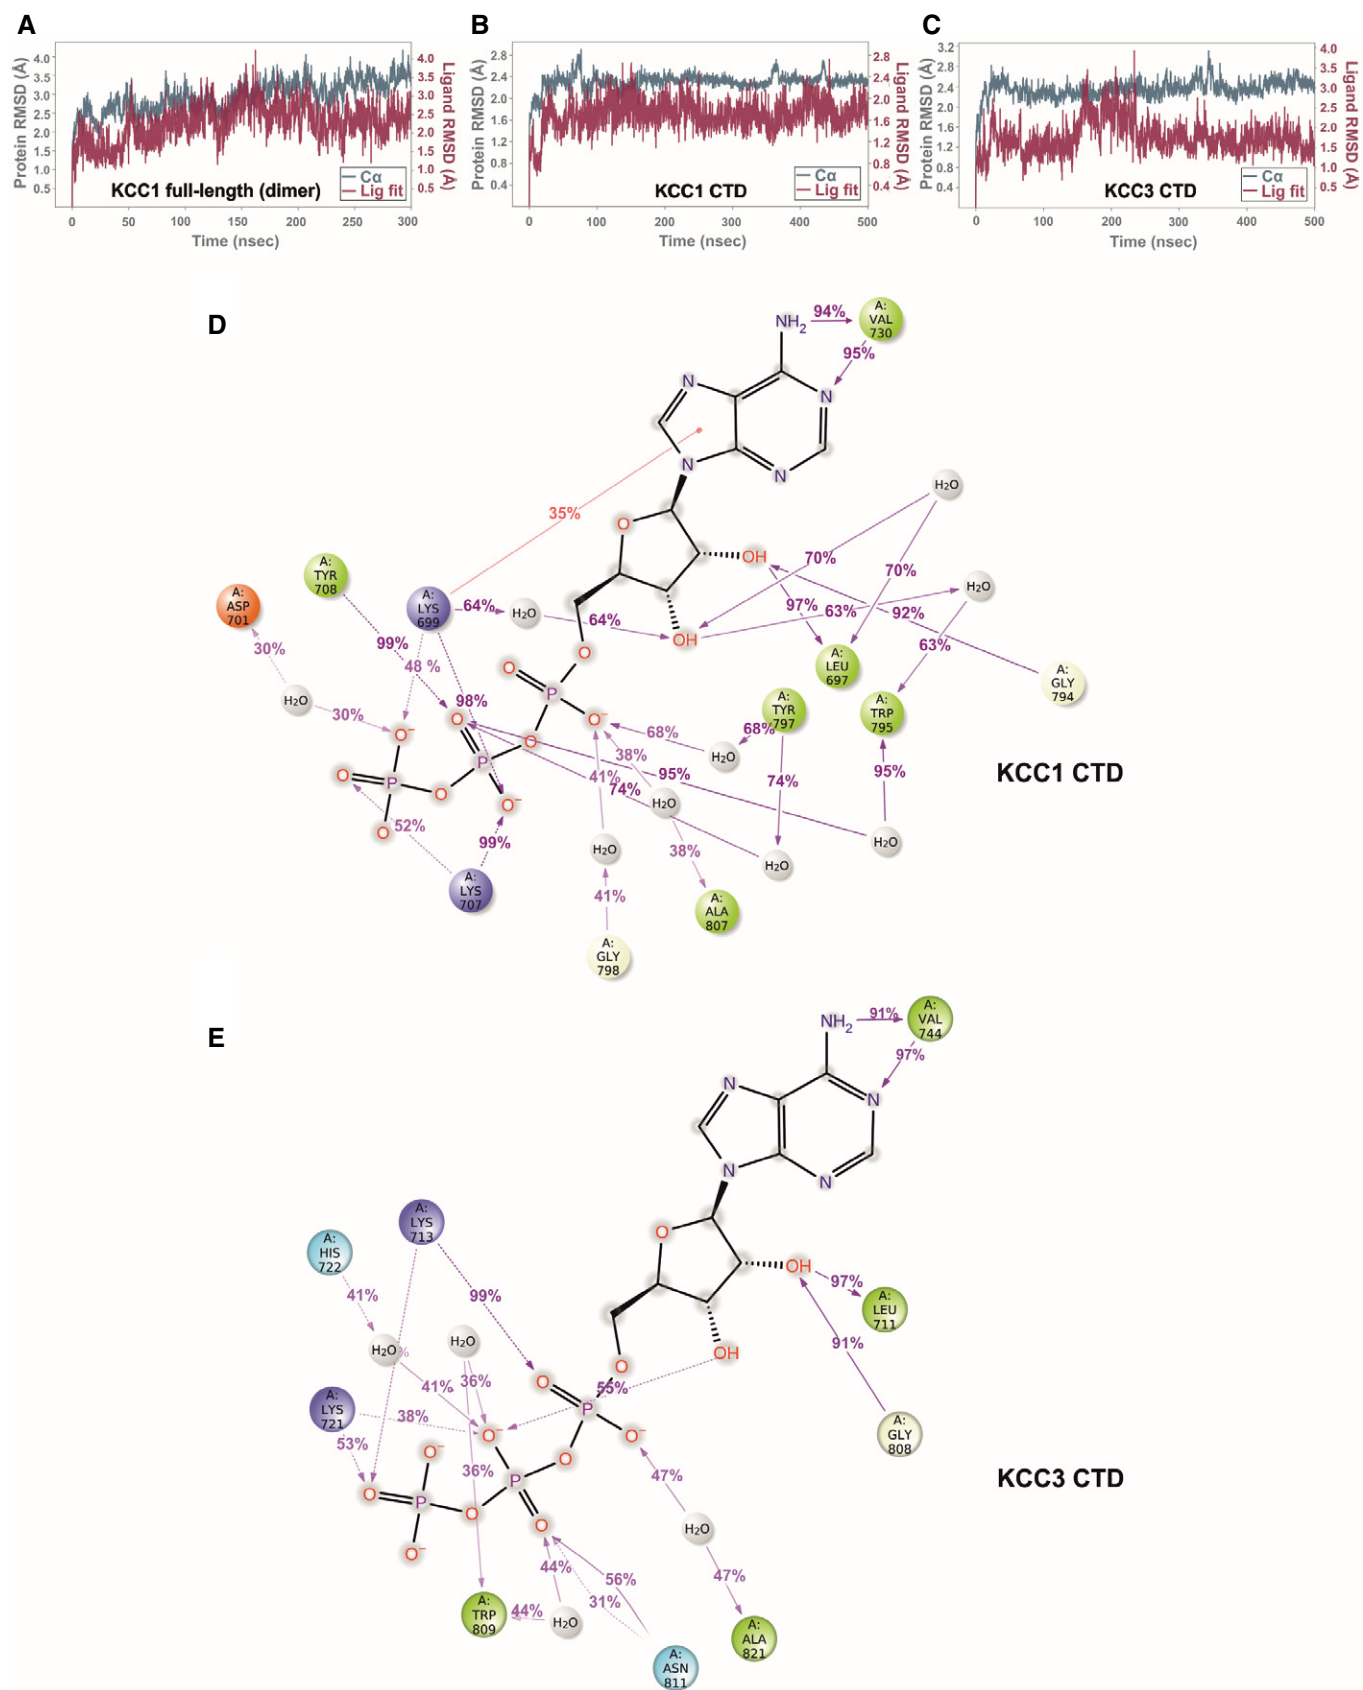

Figure EV5.
